# Supplementary material for: Imagining and Implementing Healthy City Interventions: Combined Results from Parallel Concept Mapping Exercises in Montreal with Community Members and Stakeholders
Source: Research Square preprint supplement (doi:10.21203/rs.3.rs-889586/v1), 2021-09-28
Supplement: Supplementary file 1 [file f75d5ec82af0a9d59e2b8df6.docx]

# Table A1: Community group items by cluster

|  | **Importance*** | **Feasibility** |
| --- | --- | --- |
| **Items** | **Average  (Standard**  **Deviation)** | **Average  (SD)** |
| **Cluster 1: Strengthen public transportation** | | |
| 1- Increase the speed of public transport | 2.9 (1.1) | 2.4 (0.8) |
| 4- Reduce the overall size of streets to promote usable public areas | 2.7 (0.9) | 2.3 (1.0) |
| 9- Promote active and collective transportation over automobile transport | 3.3 (0.9) | 2.9 (1.0) |
| 15- Provide cheaper and better connected public transit | 3.4 (0.8) | 2.6 (1.0) |
| 17- Increase parking spaces for car-sharing | 2.6 (0.9) | 3.0 (0.9) |
| 34- Make better east-west bus connections | 2.8 (0.9) | 3.0 (0.7) |
| 35- Improve transit services | 3.6 (0.7) | 3.1(0.9) |
| ***Average Value for Cluster 1*** | ***3.0*** | ***2.7*** |
| **Cluster 2: Reduce space dedicated to cars** | | |
| 2- Install more traffic calming measures on residential streets | 2.8 (0.8) | 3.0 (0.9) |
| 7- Synchronize the traffic lights | 2.7 (0.9) | 3.4 (0.7) |
| 29- Enforce speed limits on major arteries | 2.9 (0.9) | 3.1 (0.9) |
| 30- Decrease the space available to cars | 2.6 (1.0) | 2.5 (1.1) |
| 33- Limit traffic on the main streets, especially trucks | 2.7 (1.0) | 2.6 (0.9) |
| 36- Decrease speed limits to 30 km/h, everywhere | 2.3 (1.0) | 2.4 (1.1) |
| 39- Design commercial arteries so cars do not have priority over other modes of travel | 2.9 (0.9) | 2.8 (1.0) |
| ***Average Value for Cluster 2*** | ***2.7*** | ***2.8*** |
| **Cluster 3: Foster local social connections** | | |
| 3- Ask mayors to listen to the citizens and leave their egos aside | 2.4 (1.1) | 2.8 (1.2) |
| 6- Have more opportunities to meet my neighbors | 2.5 (0.8) | 2.8 (0.9) |
| 11- Create opportunities to gather and socialize to create a sense of belonging | 2.5 (0.8) | 2.8 (0.9) |
| 12- Increase local access to seniors' health services | 3.3 (0.7) | 2.9 (0.8) |
| 16- Use the public space to promote local initiatives that foster a sense of community, such as outdoor communal kitchens in the summer | 2.5 (0.7) | 2.6 (0.8) |
| 24- Put in place a public market nearby | 3.0 (0.9) | 2.6 (0.9) |
| 26- Allow more mixed zoning regulations to permit smaller and more affordable housing | 3.1 (0.9) | 2.9 (0.8) |
| 31- Increase the visibility of, and give space to, the historic First Nations of our territory | 2.6 (1.0) | 2.7 (1.0) |
| 32- Diversify the local commercial offer | 2.8 (1.0) | 2.5 (0.8) |
| ***Average Value for Cluster 3*** | ***2.7*** | ***2.7*** |
| **Cluster 4: Develop quality cycling infrastructure** | | |
| 5- Expand the cycling network | 3.2 (0.7) | 3.0 (1.0) |
| 18- Have more bike lanes and parking for bicycles | 3.0 (0.8) | 3.0 (0.9) |
| 20- Develop more "vélorues" (bike-centered streets) | 2.8 (0.9) | 2.3 (0.9) |
| 28- Increase the crossing time of bike lanes on major arteries | 2.7 (0.9) | 3.1 (0.8) |
| 37- Create separated bike lanes, not just painted white lines | 3.0 (0.8) | 2.8 (0.8) |
| ***Average Value for Cluster 4*** | ***2.9*** | ***2.9*** |
| **Cluster 5: Improve pedestrian accessibility** | | |
| 8- Prioritize sidewalks and streets during snow removal and not bike lanes | 2.4 (1.3) | 3.4 (0.8) |
| 21- Improve the efficiency of snow removal | 2.7 (0.9) | 3.0 (0.8) |
| 22- Improve design of streets, sidewalks and commercial space to facilitate access for people with disabilities | 3.3 (0.7) | 3.0 (0.8) |
| 25- Add links to open up neighborhoods bordered by railways and highways | 2.5 (0.8) | 2.2 (0.8) |
| ***Average Value for Cluster 5*** | ***2.7*** | ***2.9*** |
| **Cluster 6: Greening the city** | | |
| 10- Increase the number of green spaces | 3.2 (0.8) | 2.7 (1.0) |
| 13- Respect the tranquility of parks by reducing noisy activities (e,g, night festival events, "revitalization" program) | 2.0 (1.1) | 2.7 (0.9) |
| 14- Create parks on vacant lots instead of building condos | 3.0 (0.9) | 2.4 (1.0) |
| 19- Have a brown bin for food waste | 3.2 (1.0) | 3.4 (0.8) |
| 23- Have a community garden nearby | 2.8 (0.8) | 2.5 (0.9) |
| 27- Develop parks | 3.2 (0.8) | 2.8 (0.9) |
| 38- Promote the establishment of green roofs | 3.1 (0.8) | 2.9 (1.0) |
| 40- Add gardening spaces | 3.0 (0.8) | 2.5 (0.8) |
| ***Average Value for Cluster 6*** | ***2.9*** | ***2.7*** |
