# Supplementary material for: Imagining and Implementing Healthy City Interventions: Combined Results from Parallel Concept Mapping Exercises in Montreal with Community Members and Stakeholders
Source: Research Square preprint supplement (doi:10.21203/rs.3.rs-889586/v1), 2021-09-28
Supplement: Supplementary file 2 [file f97b070c08fab7a63456bc8f.docx]

# Table A2: Stakeholder group items by cluster

|  | **Importance*** | **Feasibility** |
| --- | --- | --- |
| **Items** | **Average  (Standard**  **Deviation)** | **Average  (SD)** |
| **Cluster 1: Collaboration with stakeholders & citizens** | | |
| 01-Act in consultation, involving all stakeholders, including citizens | 3.3 (0.4) | 2.8 (0.6) |
| 06-Have a communication plan adapted to the context / environment | 3.0 (0.5) | 3.0 (0.8) |
| 08-Communicate effectively and have an open dialogue ahead of transformation projects with the actors who will be affected by them  (citizens, business owners, organizations, etc.) | 3.3 (0.5) | 3.2 (0.6) |
| 10-Raise awareness among citizens about the importance of intervening | 2.9 (0.7) | 2.9 (0.7) |
| 24-Secure and support the coordination of different stakeholders | 3.0 (0.8) | 2.9 (0.8) |
| 25-Involve various stakeholders in the process (citizens, community groups, institutions, districts, traders, etc.)  for co-construction and social acceptability | 3.3 (0.6) | 3.3 (0.6) |
| 33-Ensure constant communication between city officials and civil society and break silos | 3.4 (0.5) | 2.6 (0.8) |
| 35-Engage with and integrate stakeholder actions | 3.0 (0.7) | 2.8 (0.7) |
| 14-Foster collaborative work between different actors | 3.2 (0.6) | 3.1 (0.6) |
| ***Average Value for Cluster 1*** | ***3.2*** | ***2.9*** |
| **Cluster 2: Planning & evaluation** | | |
| 2-Take advantage of opportunities that reduce costs, delays, inconveniences (e.g. work on underground infrastructure) | 3.3 (0.7) | 3.0 (0.7) |
| 4-Monitor and evaluate interventions | 3.5 (0.7) | 3.0 (0.8) |
| 27-Intervene coherently on the territory and on different factors | 3.2 (0.8) | 2.9 (0.5) |
| 31-Have easy-to-track indicators (SMART: Specific, measurable, acceptable, realistic and time-bound) | 3.2 (0.9) | 3.2 (0.7) |
| 40-Develop a concrete action plan, supported by the community, with timelines and accountability | 3.0 (0.8) | 2.8 (0.9) |
| ***Average Value for Cluster 2*** | ***3.2*** | ***3.0*** |
| **Cluster 3: Common vision for the future** | | |
| 05-Have a long-term vision, short- and medium-term objectives and monitoring indicators | 3.5 (0.6) | 3.1 (0.8) |
| 07-A common vision of sustainable development of the city shared among civil society and elected officials | 3.3 (0.6) | 2.8 (0.9) |
| 15-A vision shared by all actors | 3.1 (0.6) | 2.6 (0.6) |
| 18-Spark a common vision | 3.5 (0.5) | 2.7 (0.7) |
| 22-Define a vision for the future of the city by involving the citizens in its definition | 3.1 (0.8) | 2.9 (0.7) |
| ***Average Value for Cluster 3*** | ***3.3*** | ***2.8*** |
| **Cluster 4: Regulatory framework & funding** | | |
| 09-A structuring regulatory framework | 3.3 (0.6) | 3.1 (0.7) |
| 23-Securing massive investments | 3.1 (0.9) | 2.4 (0.9) |
| 29-Intervene on the regulatory framework to ensure long-term changes | 3.4 (0.7) | 3.0 (0.7) |
| 39-Ensure adequate funding | 3.5 (0.7) | 2.7 (0.7) |
| ***Average Value for Cluster 4*** | ***3.3*** | ***2.8*** |
| **Cluster 5: Context-informed approach** | | |
| 11-Coordinate land use planning and transport planning | 3.7 (0.6) | 3.0 (0.8) |
| 12-Knowledge of the state of infrastructure, equipment, and buildings | 3.3 (0.7) | 3.1 (0.7) |
| 16-Consider neighbourhood mix | 3.3 (0.5) | 3.0 (0.7) |
| 19-Take into account the seasonal resilience of interventions (develop for both summer and winter) | 3.0 (0.6) | 2.8 (0.8) |
| 20-Link actions to the specific needs of the population | 3.0 (0.7) | 2.8 (0.5) |
| 26-Provide functional, safe, and universally accessible facilities | 3.4 (0.6) | 3.2 (0.8) |
| 28-Take a population approach | 3.0 (0.6) | 2.8 (0.7) |
| 32-Take into consideration the traditions and populations already using the spaces and not just emerging practices | 3.0 (0.5) | 2.9 (0.5) |
| 34-Be biased towards universal accessibility | 3.5 (0.5) | 3.0 (0.8) |
| 36-Ensure responsible public management of water, recycling, compost, and waste | 3.1 (0.8) | 2.9 (0.7) |
| 37-Integrated planning of all the structuring elements of the built environment (housing, transport, shops, public services, etc.) | 3.5 (0.6) | 2.7 (0.7) |
| 38-Protect elements with heritage, landscape, or ecological value | 3.3 (0.7) | 2.9 (0.6) |
| 41-Make a preliminary analysis of the area and its socioeconomic dynamics | 3.0 (0.8) | 3.4 (0.7) |
| ***Average Value for Cluster 5*** | ***3.2*** | ***3.0*** |
